# Supplementary material
Source: MDPI journal article supplement (https://www.mdpi.com/2071-1050/15/1/758)
Supplement: s1 [file s1]

# Microplastics Release from Conventional Plastics during Real Open Windrow Composting

Anastasiia Sholokhova <sup>1,\*</sup>, Gintaras Denafas <sup>1</sup>, Justinas Ceponkus <sup>2</sup> and Rita Kriukiene <sup>3</sup>

<sup>1</sup> Department of Environmental Technology, Kaunas University of Technology, Radvilenu St. 19, LT-50254 Kaunas, Lithuania

<sup>2</sup> Institute of Chemical Physics, Vilnius University, Sauletekio Av. 3, LT-10257 Vilnius, Lithuania

<sup>3</sup> Laboratory of Material Research and Testing, Lithuanian Energy Institute, Breslaujos St. 3, LT-44403 Kaunas, Lithuania

\* Correspondence: anastasiia.sholokhova@ktu.edu

## Supplementary materials

**Table S1.** Information on plastic particles used in the experiment.

| Polymer Type | Product Type             | Weight, g          | Thickness, $\mu\text{m}$ | Photo                                                                                 |
|--------------|--------------------------|--------------------|--------------------------|---------------------------------------------------------------------------------------|
| LDPE         | Garbage bag              | $0.1151 \pm 0.002$ | 50                       |    |
| HDPE         | Garbage bag              | $0.0199 \pm 0.002$ | 10                       |   |
| R_LDPE       | Garbage bag              | $0.0572 \pm 0.008$ | 26                       |  |
| PP_film      | Sponge packaging film    | $0.0449 \pm 0.003$ | 20                       |  |
| PP_fr        | Cottage cheese container | $0.391 \pm 0.056$  | 160                      |  |
| PS           | Cake packaging           | $0.8657 \pm 0.038$ | 340                      |  |
| PLA          | Garbage bag              | $0.0412 \pm 0.005$ | 16                       |  |

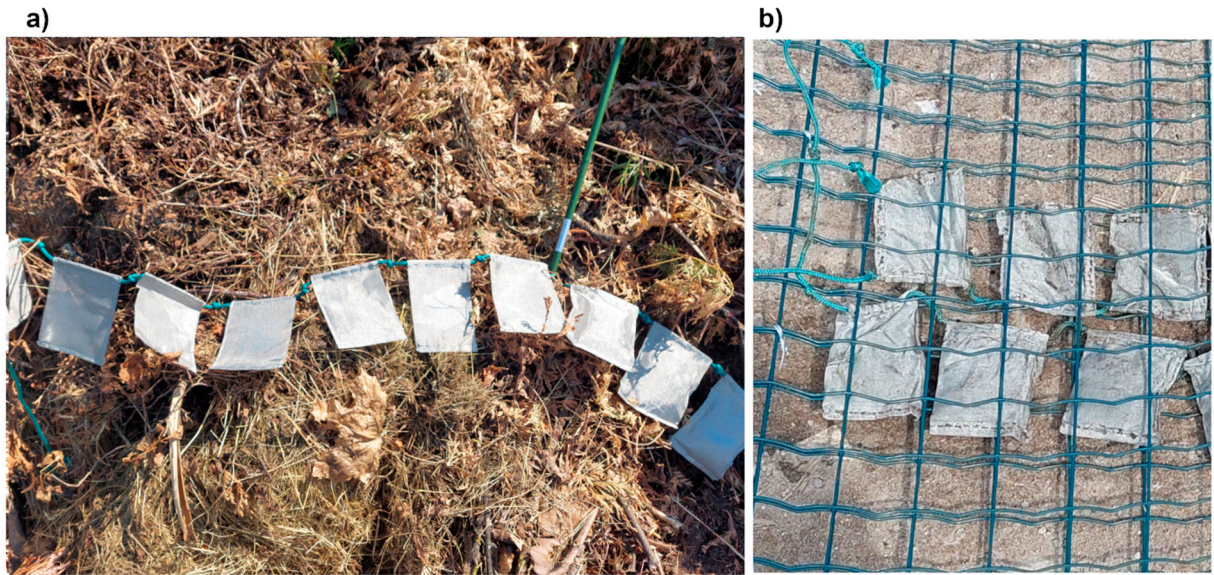

**Figure S1.** Plastic samples are enclosed in steel meshbags before being buried in the compost pile (a) between steel grids (b).

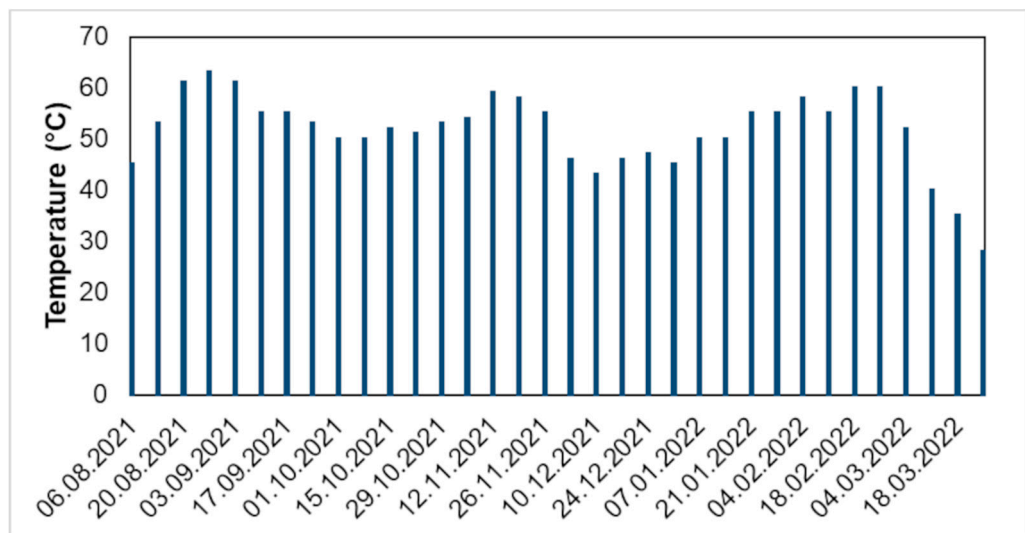

**Figure S2.** Temperature during composting.

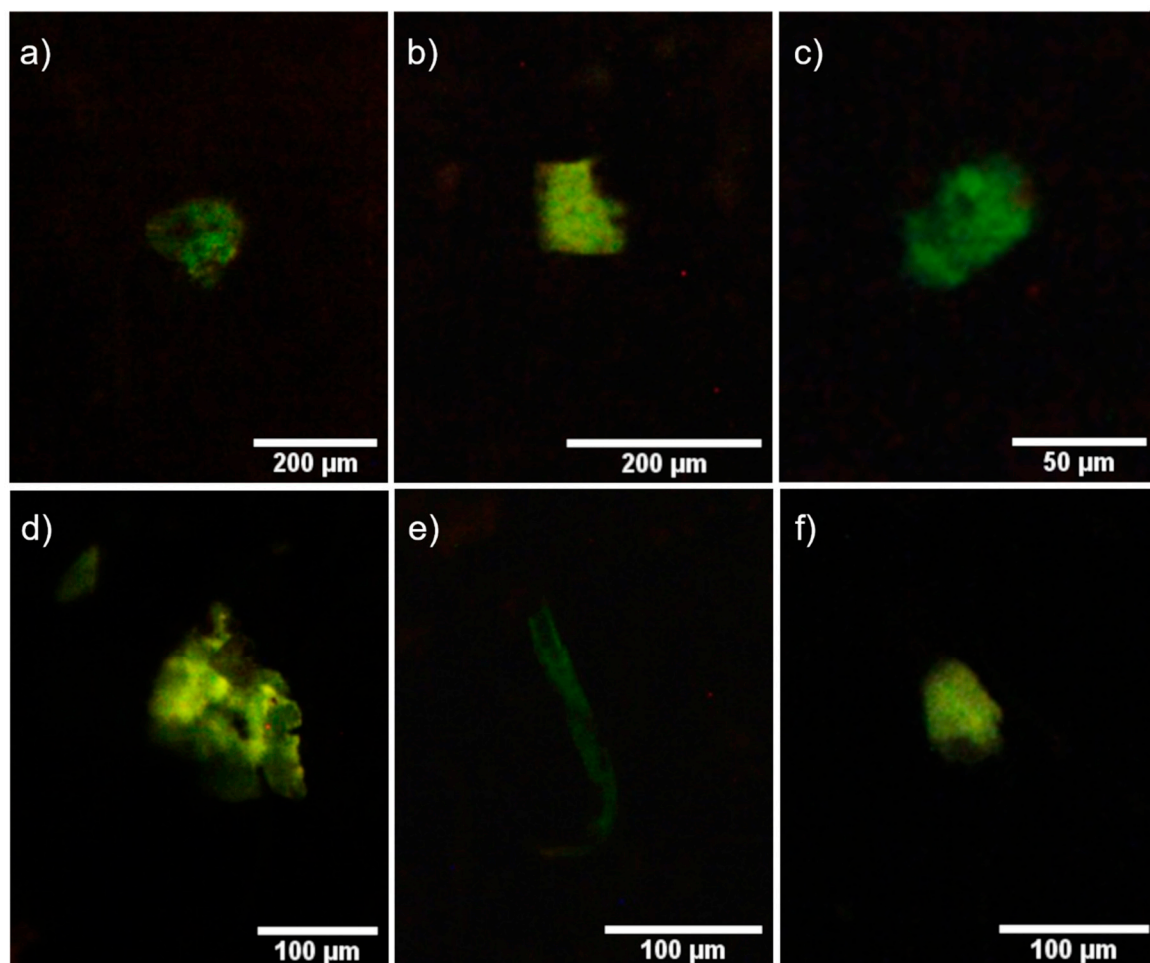

**Figure S3.** Examples of fluorescence image of (a) HDPE; (b) LDPE; (c) R\_LDPE; (d) PS; (e) PP\_film; (f) PP\_fr.

**Table S2.** Plastic samples before and after composting.

| Polymer Type  | Before                                                                              | After                                                                               |
|---------------|-------------------------------------------------------------------------------------|-------------------------------------------------------------------------------------|
| HDPE          |    |    |
| LDPE          |    |    |
| Recycled LDPE |    |    |
| PS            |   |   |
| PP_film       |  |  |
| PP_fr         |  |  |
